# Supplementary material
Source: PubMed Central journal article supplement (PMC6866001)

## Online Supplemental Material

**Supplemental Table 1.** Comparison of characteristics for participants included versus excluded from the analytic sample

|                                                         | Included in analysis<br>(n=2,084) | Excluded from analysis <sup>1</sup> | p-value <sup>2</sup> |
|---------------------------------------------------------|-----------------------------------|-------------------------------------|----------------------|
| Prepregnancy BMI, kg/m <sup>2</sup> [Mean±SD] (n)       | 22.0±3.4 (2,084)                  | 22.6±0.17 (545)                     | <0.001               |
| Prepregnancy BMI category,%                             |                                   |                                     | 0.001                |
| Underweight (<18.5 kg/m <sup>2</sup> )                  | 182 (8.7)                         | 38 (7.0)                            |                      |
| Normal weight (18.5-24.9 kg/m <sup>2</sup> )            | 1,609 (77.2)                      | 402 (73.8)                          |                      |
| Overweight (25-29.9 kg/m <sup>2</sup> )                 | 234 (11.2)                        | 73 (13.4)                           |                      |
| Obese (≥30 kg/m <sup>2</sup> )                          | 59 (2.8)                          | 32 (5.9)                            |                      |
| Pregnancy weight gain, kg [Mean±SD] (n)                 | 12.0±4.3 (2,084)                  | 12.7±5.9 (492)                      | 0.07                 |
| Maternal Race, %                                        |                                   |                                     | 0.13                 |
| White                                                   | 1,492 (71.6)                      | 1,115 (69.4)                        |                      |
| Black                                                   | 445 (21.4)                        | 366 (22.8)                          |                      |
| Hispanic                                                | 56 (2.7)                          | 62 (3.9)                            |                      |
| Asian                                                   | 91 (4.4)                          | 64 (4.0)                            |                      |
| Multiparous (yes/no), %                                 | 1,234 (76.8)                      | 1,621 (77.8)                        | 0.51                 |
| Maternal age, y [Mean±SD] (n)                           | 28.4±5.9 (2,084)                  | 28.2±6.2 (1,597)                    | 0.44                 |
| Maternal education, %                                   |                                   |                                     | <0.001               |
| Less than high school                                   | 264 (12.7)                        | 302 (18.9)                          |                      |
| High school and/or Trade School                         | 901 (43.2)                        | 705 (44.1)                          |                      |
| Some college/College degree                             | 919 (44.1)                        | 592 (37.0)                          |                      |
| Maternal Raw Peabody <sup>1</sup> , score [Mean±SD] (n) | 125.5±18.4 (1,652)                | 123.6±20.1 (1,224)                  | 0.07                 |
| Married (yes/no), %                                     | 2,055 (98.6)                      | 1,541 (98.2)                        | 0.34                 |
| Income, relative to 1960 census median, %               |                                   |                                     | <0.001               |
| Below median                                            | 719 (34.5)                        | 646 (52.5)                          |                      |
| At median                                               | 339 (16.3)                        | 199 (16.2)                          |                      |
| Above median                                            | 1,026 (49.2)                      | 385 (31.3)                          |                      |
| <b>Child</b>                                            |                                   |                                     |                      |
| Male sex, %                                             | 1,077 (51.7)                      | 805 (50.1)                          | 0.34                 |
| Birthweight, grams [Mean±SD] (n)                        | 3352±508 (2,084)                  | 3379±527 (1,607)                    | 0.11                 |
| Age at 9 year exam, y [Mean±SD] (n)                     | 9.82±0.82 (2,084)                 | 10.34±0.87 (1,607)                  | <0.001               |
| Weight at age 9, kg [Mean±SD] (n)                       | 33.5±7.2 (2,084)                  | 35.6±7.8 (1,594)                    | <0.001               |
| Height at age 9, cm [Mean±SD] (n)                       | 137.6±7.6 (2,084)                 | 140.3±7.6 (1,594)                   | <0.001               |
| Standardized Peabody score <sup>2</sup> [Mean±SD] (n)   | 50.6±10.0 (2,084)                 | 49.3±9.9 (1,541)                    | <0.001               |
| Standardized Raven score <sup>2</sup> [Mean±SD] (n)     | 50.4±10.0 (2,084)                 | 49.5±10.0 (1,604)                   | 0.01                 |

<sup>1</sup>Sample size varies due to missing data. <sup>2</sup>Preliminary analyses compared the baseline characteristics of dyads in the analytic sample (n=2,084) to those who were not in the analysis but who had child cognitive outcomes measured at ages 9-11 (n=1,653) using chi-square tests for categorical variables and t-tests for continuous normally distributed variables and Wilcoxon rank-sum test for non-normally distributed continuous variables

**Supplemental Table 2.** Adjusted Associations between Maternal Prepregnancy BMI, Pregnancy Weight Gain and Child Cognitive Scores at age 9, Child Health and Development Studies Enrolled from 1960-1963

|                                                                                                                                         | PPVT Score         |              | Raven Score        |              |
|-----------------------------------------------------------------------------------------------------------------------------------------|--------------------|--------------|--------------------|--------------|
|                                                                                                                                         | Estimated- $\beta$ | 95% CI       | Estimated- $\beta$ | 95% CI       |
| <b>Model 1: Primary model with interaction terms (n=2084)</b>                                                                           |                    |              |                    |              |
| Prepregnancy BMI category                                                                                                               |                    |              |                    |              |
| Underweight                                                                                                                             | -0.40              | -5.19, 4.38  | -0.83              | -5.48, 3.83  |
| Normal weight                                                                                                                           | Referent           |              | Referent           |              |
| Overweight                                                                                                                              | -3.30              | -6.17, -0.43 | -3.43              | -6.55, -0.30 |
| Obese                                                                                                                                   | -5.47              | -9.23, -1.71 | -0.88              | -5.10, 3.34  |
| Interaction term between GWG and BMI: Estimated $\beta$ for a 1-unit increase in pregnancy weight gain by prepregnancy BMI category, kg |                    |              |                    |              |
| Underweight                                                                                                                             | 0.06               | -0.29, 0.41  | 0.03               | -0.32, 0.38  |
| Normal weight                                                                                                                           | -0.09              | -0.21, 0.04  | -0.003             | -0.13, 0.12  |
| Overweight                                                                                                                              | 0.17               | -0.05, 0.39  | 0.23               | -0.001, 0.47 |
| Obese                                                                                                                                   | 0.31               | -0.03, 0.66  | -0.09              | -0.55, 0.36  |
| <b>Model 2: Primary model (n=2084)</b>                                                                                                  |                    |              |                    |              |
| Prepregnancy BMI category                                                                                                               |                    |              |                    |              |
| Underweight                                                                                                                             | 0.36               | -1.20, 1.91  | -0.51              | -2.01, 0.99  |
| Normal weight                                                                                                                           | Referent           |              | Referent           |              |
| Overweight                                                                                                                              | -1.29              | -2.55, -0.04 | -0.71              | -2.09, 0.67  |
| Obese                                                                                                                                   | -2.65              | -4.99, -0.32 | -1.43              | -4.27, 1.42  |
| Estimated $\beta$ for a 1-unit increase in pregnancy weight gain, kg                                                                    | -0.03              | -0.13, 0.07  | 0.04               | -0.06, 0.14  |
| <b>Model 3: Primary model, unadjusted (n=2084)</b>                                                                                      |                    |              |                    |              |
| Prepregnancy BMI category                                                                                                               |                    |              |                    |              |
| Underweight                                                                                                                             | -0.98              | -2.53, 0.57  | -1.09              | -2.59, 0.41  |
| Normal weight                                                                                                                           | Referent           |              | Referent           |              |
| Overweight                                                                                                                              | -0.95              | -2.30, 0.40  | -1.04              | -2.39, 0.31  |
| Obese                                                                                                                                   | -3.00              | -5.24, -0.75 | -2.15              | -5.00, 0.71  |
| Estimated $\beta$ for a 1-unit increase in pregnancy weight gain, kg                                                                    | -0.08              | -0.18, 0.02  | 0.02               | -0.08, 0.13  |
| <b>Model 4: GWG quartiles (n=2084)</b>                                                                                                  |                    |              |                    |              |
| Prepregnancy BMI category                                                                                                               |                    |              |                    |              |
| Underweight                                                                                                                             | 0.36               | -1.20, 1.91  | -0.48              | -1.98, 1.02  |
| Normal weight                                                                                                                           | Referent           |              | Referent           |              |
| Overweight                                                                                                                              | -1.29              | -2.56, -0.03 | -0.80              | -2.19, 0.60  |
| Obese                                                                                                                                   | -2.63              | -4.96, -0.30 | -1.66              | -4.46, 1.15  |
| GWG quartiles                                                                                                                           |                    |              |                    |              |
| Quartile 1 [Mean (SD): 6.91 kg (2.21)]                                                                                                  | 0.38               | -0.80, 1.56  | 0.57               | -0.63, 1.78  |
| Quartile 2 [Mean (SD): 10.50 kg (0.75)]                                                                                                 | Referent           |              | Referent           |              |
| Quartile 3 [Mean (SD): 13.1 kg (0.78)]                                                                                                  | 0.35               | -0.74, 1.44  | 0.69               | -0.50, 1.88  |

|                                                                             |          |              |          |             |
|-----------------------------------------------------------------------------|----------|--------------|----------|-------------|
| Quartile 4 [Mean (SD): 17.6 kg (2.85)]                                      | -0.10    | -1.24, 1.04  | 0.68     | -0.50, 1.86 |
| <b>Model 5: Oldest CHDS child per family (n=1825)</b>                       |          |              |          |             |
| Prepregnancy BMI category                                                   |          |              |          |             |
| Underweight                                                                 | -0.16    | -1.72, 1.40  | -1.33    | -2.95, 0.29 |
| Normal weight                                                               | Referent |              | Referent |             |
| Overweight                                                                  | -1.12    | -2.56, 0.32  | -0.48    | -1.98, 1.02 |
| Obese                                                                       | -2.92    | -5.52, -0.31 | -1.60    | -4.31, 1.11 |
| Estimated $\beta$ for a 1-unit increase in pregnancy weight gain, kg        | -0.02    | -0.13, 0.09  | 0.04     | -0.07, 0.16 |
| <b>Model 6: Excluding those measured 7-28 days before delivery (n=1882)</b> |          |              |          |             |
| Prepregnancy BMI category                                                   |          |              |          |             |
| Underweight                                                                 | -0.17    | -1.86, 1.51  | -0.90    | -2.51, 0.72 |
| Normal weight                                                               | Referent |              | Referent |             |
| Overweight                                                                  | -1.05    | -2.36, 0.25  | -0.57    | -2.02, 0.88 |
| Obese                                                                       | -2.07    | -4.63, 0.50  | -0.88    | -4.07, 2.31 |
| Estimated $\beta$ for a 1-unit increase in pregnancy weight gain, kg        | -0.03    | -0.14, 0.08  | 0.05     | -0.06, 0.16 |
| <b>Model 7: Term deliveries (n=1953)</b>                                    |          |              |          |             |
| Prepregnancy BMI category                                                   |          |              |          |             |
| Underweight                                                                 | 0.20     | -1.38, 1.79  | -0.56    | -2.07, 0.95 |
| Normal weight                                                               | Referent |              | Referent |             |
| Overweight                                                                  | -1.42    | -2.70, -0.14 | -0.62    | -2.03, 0.79 |
| Obese                                                                       | -2.31    | -4.72, 0.10  | -1.65    | -4.58, 1.29 |
| Estimated $\beta$ for a 1-unit increase in pregnancy weight gain, kg        | -0.02    | -0.12, 0.08  | 0.04     | -0.07, 0.14 |
| <b>Model 8: Adding maternal IQ (n=1652)</b>                                 |          |              |          |             |
| Prepregnancy BMI category                                                   |          |              |          |             |
| Underweight                                                                 | 0.63     | -0.98, 2.24  | -0.70    | -2.29, 0.89 |
| Normal weight                                                               | Referent |              | Referent |             |
| Overweight                                                                  | -1.01    | -2.44, 0.42  | -0.61    | -2.18, 0.96 |
| Obese                                                                       | -2.23    | -4.74, 0.28  | -2.05    | -5.24, 1.14 |
| Estimated $\beta$ for a 1-unit increase in pregnancy weight gain, kg        | 0.02     | -0.10, 0.13  | 0.09     | -0.03, 0.21 |
| <b>Model 9: IPW (n=2084)</b>                                                |          |              |          |             |
| Prepregnancy BMI category                                                   |          |              |          |             |
| Underweight                                                                 | 0.37     | -1.16, 1.90  | -0.44    | -1.94, 1.07 |
| Normal weight                                                               | Referent |              | Referent |             |
| Overweight                                                                  | -1.42    | -2.67, -0.17 | -0.73    | -2.10, 0.64 |
| Obese                                                                       | -2.55    | -4.92, -0.17 | -1.21    | -4.09, 1.67 |
| Estimated $\beta$ for a 1-unit increase in pregnancy weight gain, kg        | -0.02    | -0.12, -0.08 | 0.04     | -0.07, 0.14 |

Results shown are estimated  $\beta$ -coefficients for age, sex and race standardized continuous Peabody and Raven scores from multivariable linear regression models for each test, controlling for covariates. Normal weight prepregnancy BMI is the reference group. The adjustment set included pregnancy weight gain, maternal age, race, parity, income, education, and child birth weight, and size at 9-years. Models 1-3, 5 included robust standard errors to account for clustering by family. Model 8 included adjustment for multiple children in CHDS. GWG, Gestational weight gain; IPW, Inverse probability weight; PPVT, Peabody Picture Vocabulary Test.

**Supplemental Figure 1.** Adherence to 2009 Institute of Medicine pregnancy weight gain recommendations for each prepregnancy BMI category (n=2,084), Child Health and Development Studies (1960 to 1963). 8.7% of women were underweight before pregnancy, 77.2% were normal weight, 11.2% were overweight, and 2.8% were obese.

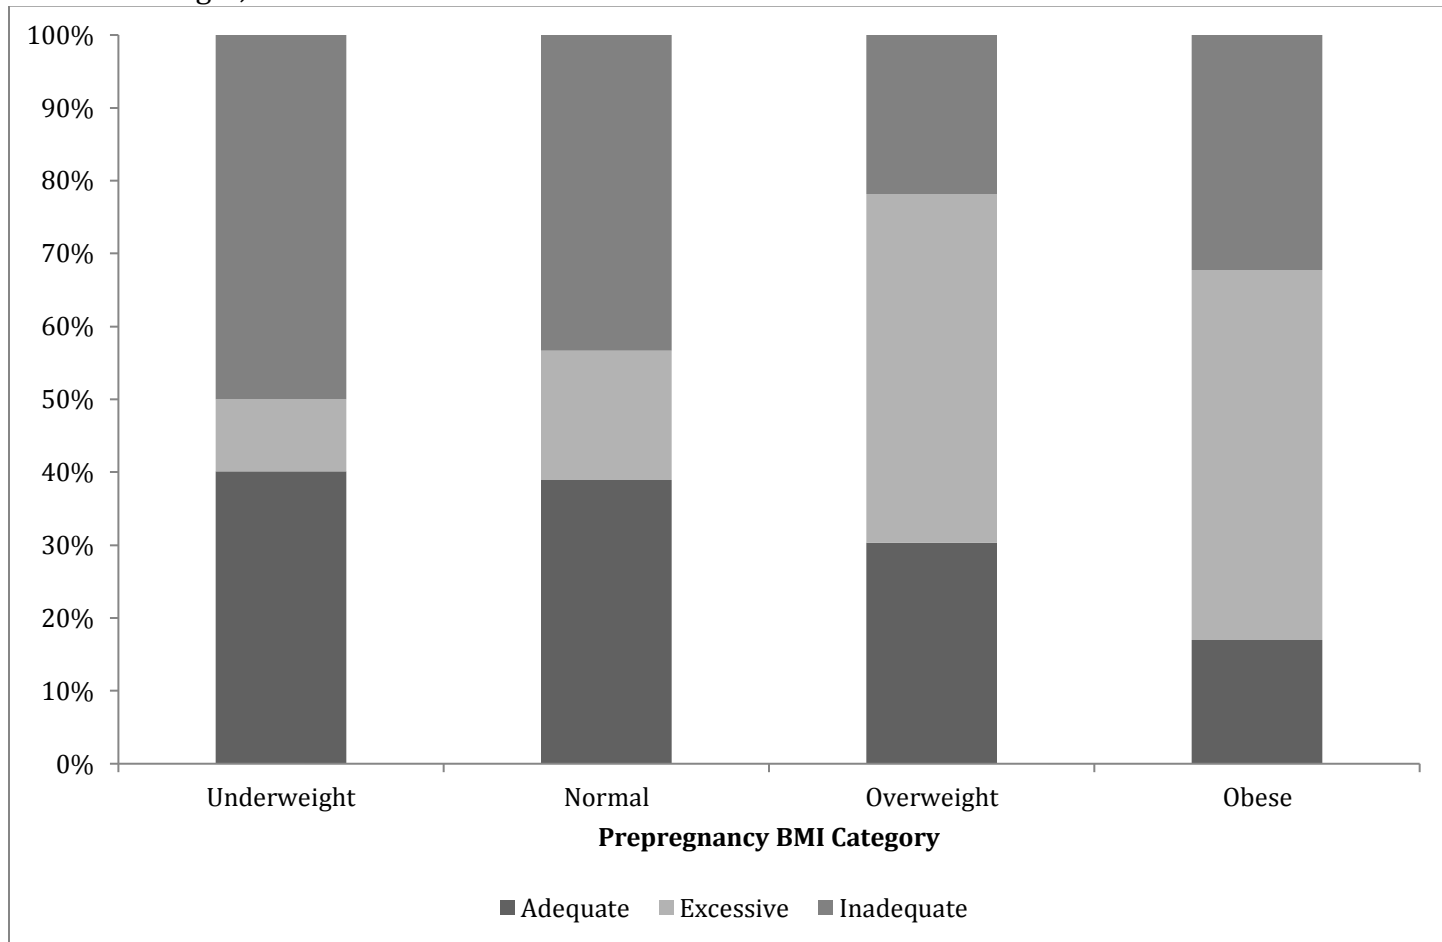

Supplement: MCN-14-e12481-s001.pdf [file MCN-14-e12481-s001.pdf]
